# Supplementary material for: Genetic Toolbox Approaches in Mosquitoes.
Source: HighWire-hosted journal article supplement (doi:10.1101/pdb.top107691), 2022-11-01
Supplement: Supplemental_Table_S1_S2_S3.pdf [file Supplemental_Table_S1_S2_S3.pdf]

**Table S1: Examples of applications of RNAi in mosquitoes**

| Delivery        | Mosquito Species                     | Target                                    | Effect                                                                                                                                                                                                              | RNAi trigger | Reference                   |
|-----------------|--------------------------------------|-------------------------------------------|---------------------------------------------------------------------------------------------------------------------------------------------------------------------------------------------------------------------|--------------|-----------------------------|
| Microinjection  | <i>An. gambiae</i> , larvae          | <i>OR7, OR40, IR76b</i>                   | Impaired olfaction                                                                                                                                                                                                  | siRNA        | (Liu et al. 2010)           |
|                 | <i>An. gambiae</i> , larvae          | <i>TRPA1</i>                              | Impaired thermosensation                                                                                                                                                                                            | siRNA        | (Liu & Zwiebel 2013)        |
|                 | <i>An. gambiae</i> , pupae           | <i>SRPN2</i>                              | Increased hemocoel tumors by 93.5%, and 26.7% reduction in adult emergence of knockdown mosquitoes                                                                                                                  | dsRNA        | (Regna et al. 2016)         |
|                 | <i>An. gambiae</i> , adult           | <i>SRPN2</i>                              | 90% reduction in <i>Plasmodium berghei</i> but not <i>Plasmodium falciparum</i> in midgut                                                                                                                           | dsRNA        | (Michel et al. 2006)        |
|                 | <i>An. gambiae</i> , adult           | <i>AgApy</i>                              | Unsuccessful                                                                                                                                                                                                        | dsRNA        | (Boisson et al. 2006)       |
|                 | <i>An. stephensi</i> , embryo        | <i>EGFP</i>                               | 73% knockdown efficiency of EGFP                                                                                                                                                                                    | dsRNA        | (Brown et al. 2003)         |
|                 | <i>Ae. aegypti</i> , larvae          | <i>Fez2</i> and <i>Irc</i>                | Neuronal defects, high adult and larvae mortality                                                                                                                                                                   | siRNA        | (Hapairai et al. 2017)      |
|                 | <i>Ae. aegypti</i> , larvae          | <i>AeSCP-2</i>                            | Mortality in first 3 days of emergence, reduction in cholesterol, reduction in percentage of eggs hatching from treated females                                                                                     | siRNA        | (Blitzer et al. 2005)       |
|                 | <i>Ae. aegypti</i> , adult and pupae | <i>AaGr1, AaGr2</i>                       | 74 -86% reduction of gene expression                                                                                                                                                                                | dsRNA        | (Erdelyan et al. 2012)      |
|                 | <i>Ae. aegypti</i> , adult           | <i>Cactus, Caspar</i>                     | Fourfold reduction in dengue virus load                                                                                                                                                                             | dsRNA        | (Xi et al. 2008)            |
|                 | <i>Ae. aegypti</i> , adult           | <i>AeIMUC1</i> and <i>SDR</i>             | 36.5% reduction in <i>Plasmodium gallinaceum</i> eggs in <i>dsSDR</i> -treated females and 52.3% reduction of <i>Plasmodium gallinaceum</i> eggs in <i>dsAeIMUC1</i> treated females.                               | dsRNA        | (Berois et al. 2012)        |
|                 | <i>Ae. aegypti</i> , adult           | <i>EOF1</i>                               | 60% non-melanized abnormal eggs, reduction in egg hatching, primary follicles undergo cell death in treated females                                                                                                 | dsRNA        | (Isoe et al. 2019)          |
|                 | <i>C. pipiens</i> , adult            | <i>per, tim, cry2, cyc</i> and <i>pdf</i> | Egg follicle length and ovarian lipid content reduced. RNAi had varied success per gene: <i>per</i> (40%), <i>tim</i> (25%), <i>cry2</i> (45%), <i>cyc</i> (15%) and <i>pdf</i> (60%) reduction in mRNA expression. | dsRNA        | (Meuti et al. 2015)         |
| Feeding/soaking | <i>Ae. aegypti</i> , larvae          | <i>AeNAT5</i>                             | Larval growth, adult emergence                                                                                                                                                                                      | dsRNA        | (Meleshkevitch et al. 2013) |

|                                                      |                                                                                              |                                                                                  |                                                                                                                                                                                                                                 |       |                               |
|------------------------------------------------------|----------------------------------------------------------------------------------------------|----------------------------------------------------------------------------------|---------------------------------------------------------------------------------------------------------------------------------------------------------------------------------------------------------------------------------|-------|-------------------------------|
|                                                      | <i>Ae. aegypti</i> , larvae                                                                  | <i>AaegP-gp</i> ,<br><i>AaegP-gp</i> ,<br><i>AaegRPS6</i>                        | Knockdown caused a significant increase in temephos toxicity (57%) and larval death                                                                                                                                             | dsRNA | (Figueira-Mansur et al. 2013) |
|                                                      | <i>Ae. aegypti</i> , larvae                                                                  | <i>CHS1</i> , <i>CHS2</i> ,<br><i>hsp83</i>                                      | Affected growth                                                                                                                                                                                                                 | dsRNA | (Singh et al. 2013)           |
| Chitosan/nanoparticles feeding                       | <i>Ae. aegypti</i> , larvae                                                                  | <i>dopal synthase</i>                                                            | Affected cuticle formation and caused high mortality                                                                                                                                                                            | dsRNA | (Chen et al. 2019)            |
|                                                      | <i>Ae. aegypti</i> , larvae                                                                  | <i>sema1</i>                                                                     | Affected olfactory development                                                                                                                                                                                                  | siRNA | (Mysore et al. 2013)          |
|                                                      | <i>Ae. aegypti</i> , larvae                                                                  | <i>vg</i>                                                                        | Affected wing development, induced high larval and adult mortality                                                                                                                                                              | dsRNA | (Ramesh Kumar et al. 2016)    |
| Chitosan/nanoparticles coated in agarose gel feeding | <i>Ae. aegypti</i> , larvae                                                                  | <i>AgCHS1</i> and<br><i>AgCHS2</i>                                               | Reduction of <i>AgCHS1</i> (by 62.8%) and <i>AGCH2</i> (by 33.8%) in foregut, midgut, hindgut, and carcass. Increased larval mortality                                                                                          | dsRNA | (Zhang et al. 2010)           |
| Bacterial delivery                                   | <i>An. gambiae</i> , larvae                                                                  | <i>sac1</i> , <i>lrc</i> , <i>otk</i>                                            | Affected neuronal synapse formation, caused high larval mortality                                                                                                                                                               | siRNA | (Mysore et al. 2017)          |
|                                                      | <i>An. gambiae</i> , larvae                                                                  | <i>Agdsxf</i>                                                                    | 66% mRNA female <i>dsx</i> transcript reduction, 20.2% reduction in female progeny                                                                                                                                              | dsRNA | (Taracena et al. 2019)        |
|                                                      | <i>Ae. aegypti</i> , larvae                                                                  | <i>vg</i>                                                                        | Affected wing development, induced high larval and adult mortality                                                                                                                                                              | dsRNA | (Ramesh Kumar et al. 2016)    |
|                                                      | <i>Ae. aegypti</i> , larvae                                                                  | <i>gas8</i> , <i>bol</i> , <i>fzo</i> ,<br><i>nht</i> , <i>zpg</i> , <i>dsxf</i> | 92% sterility and low fertility in males                                                                                                                                                                                        | dsRNA | (Whyard et al. 2015)          |
|                                                      | <i>Ae. aegypti</i> , larvae                                                                  | <i>CHSA</i> , <i>CHSB</i>                                                        | Reduction in chitinous bristles on the abdominal segments, thinner cuticle with holes in the exoskeleton, light disruption in the intestine, overall chitin synthesis disruption. High larval mortality and low adult emergence | dsRNA | (Lopez et al. 2019)           |
| Yeast delivery                                       | <i>Ae. aegypti</i> , <i>Ae. albopictus</i> , <i>An. gambiae</i> , <i>C. quinquefasciatus</i> | <i>Sem1a</i>                                                                     | Neuronal defects, high larval mortality                                                                                                                                                                                         | shRNA | (Mysore et al. 2019)          |

|                       |                                                                                |                           |                                                                      |       |                              |
|-----------------------|--------------------------------------------------------------------------------|---------------------------|----------------------------------------------------------------------|-------|------------------------------|
|                       | <i>Ae. aegypti</i> , <i>Ae. albopictus</i> , <i>An. gambiae</i> , adult stages | <i>dop1</i>               | Neuronal defects, high larval and adult mortality                    | shRNA | (Mysore et al. 2020)         |
|                       | <i>Ae. aegypti</i> , larvae                                                    | <i>AeaJHAMT</i>           | 50% reduction in egg development                                     | dsRNA | (Van Ekert et al. 2014)      |
|                       | <i>Ae. aegypti</i> , larvae                                                    | <i>fez2</i> , <i>lrc</i>  | Neuronal defects, high larval mortality                              | siRNA | (Hapairai et al. 2017)       |
| Algal delivery        | <i>An. stephensi</i> , larvae                                                  | <i>3-HKT</i>              | 40% increased larval mortality                                       | dsRNA | (Kumar et al. 2013)          |
| Viral delivery        | <i>Ae. albopictus</i> , larvae                                                 | <i>v-ATPase subunit A</i> | 70% reduction in gene expression, reduced survival in treated larvae | siRNA | (Gu et al. 2011)             |
| Dehydration/hydration | <i>C. pipiens</i> , larvae                                                     | <i>hsp90</i>              | Method works for fourth instar but not first instar larvae           | dsRNA | (Lopez-Martinez et al. 2012) |

**Table S2. Examples of mutant and transgenic lines in mosquitoes**

| Genetic tool         | Mosquito species      | Transgenic/mutant line                                                                                                                                                                                                                                                                                                                                          | Reference               |
|----------------------|-----------------------|-----------------------------------------------------------------------------------------------------------------------------------------------------------------------------------------------------------------------------------------------------------------------------------------------------------------------------------------------------------------|-------------------------|
| ZFN knockout         | <i>Ae. aegypti</i>    | Multiple <i>ORCO</i> <sup>-</sup> mutant lines. Mutant mosquitoes have impaired olfactory perception.                                                                                                                                                                                                                                                           | (Degennaro et al. 2013) |
|                      | <i>Ae. aegypti</i>    | <i>GR3</i> <sup>-</sup> and <i>GR3</i> <sup>pUb-ECFP</sup> mutant lines. <i>GR3</i> <sup>pUb-ECFP</sup> has <i>polyubiquitin promoter-ECFP</i> construct inserted into the <i>GR3</i> gene, providing a visual marker for mutant individuals. Mutant mosquitoes have impaired CO <sub>2</sub> perception.                                                       | (McMeniman et al. 2014) |
|                      | <i>Ae. aegypti</i>    | <i>TRPA1</i> <sup>pUb-ECFP</sup> and <i>GR19</i> <sup>pUb-DsRed</sup> mutant lines, marked with <i>ECFP</i> or <i>DsRed</i> , respectively, driven by <i>polyubiquitin</i> promoter. <i>TRPA1</i> <sup>pUb-ECFP</sup> mutants had impaired high temperature sensitivity. <i>GR19</i> <sup>pUb-DsRed</sup> mutants had no detectable defects in thermosensation. | (Corfas et al. 2015)    |
| TALEN knockout       | <i>Ae. aegypti</i>    | Multiple <i>kmo</i> <sup>-</sup> mutant lines. Mutant mosquitoes have white eye color as larvae, pupae, and adults.                                                                                                                                                                                                                                             | (Aryan et al. 2013)     |
|                      | <i>A. gambiae</i>     | Multiple <i>TEP1</i> <sup>-</sup> mutant lines. Mutant mosquitoes have increased susceptibility to <i>Plasmodium</i> infection.                                                                                                                                                                                                                                 | (Smidler et al. 2013)   |
| CRISPR-Cas9 knockout | <i>A. gambiae</i>     | Mutants of immunity gene <i>FREP1</i> <sup>-</sup> . Mutant mosquitoes suppress <i>Plasmodium</i> infection, but also have delayed development and reduced fitness.                                                                                                                                                                                             | (Dong et al. 2018)      |
|                      | <i>A. gambiae</i>     | <i>AGAP009616</i> <sup>-</sup> mutant lines of a Zn- and pH-gated ion channel expressed in the mosquito midgut. Mutant mosquitoes were not viable.                                                                                                                                                                                                              | (Redhai et al. 2020)    |
|                      | <i>A. stephensi</i>   | Immune gene <i>LRIM1</i> <sup>-</sup> mutant lines with affected microbiota, fecundity, and fertility.                                                                                                                                                                                                                                                          | (Inbar et al. 2021)     |
|                      | <i>A. funestus</i>    | <i>white</i> <sup>-</sup> mutants that have white eye color as adults.                                                                                                                                                                                                                                                                                          | (Li et al. 2018)        |
|                      | <i>A. albimanus</i>   | <i>white</i> <sup>-</sup> mutants that have white eye color as adults.                                                                                                                                                                                                                                                                                          | (Li et al. 2018)        |
|                      | <i>Ae. aegypti</i>    | Mutants in <i>ppk204</i> (AAEL010779), <i>ppk322</i> (AAEL004091), <i>ppk316</i> (AAEL000926), <i>ppk306</i> (AAEL014228), <i>ppk103</i> (AAEL002575), AAEL013647, and <i>wtrw</i> (AAAEL027478).                                                                                                                                                               | (Kistler et al. 2015)   |
|                      | <i>Ae. aegypti</i>    | <i>NPYLR7</i> <sup>-</sup> (neuropeptide Y-like receptor 7) mutants that have affected host-seeking after a blood meal.                                                                                                                                                                                                                                         | (Duvall et al. 2019)    |
|                      | <i>Ae. aegypti</i>    | <i>kmo</i> <sup>-</sup> and <i>Met</i> <sup>-</sup> mutants, generated via transgenic expression of Cas9 and sgRNA.                                                                                                                                                                                                                                             | (Zhu et al. 2021)       |
|                      | <i>Ae. albopictus</i> | Multiple <i>kh</i> <sup>-</sup> and <i>yellow</i> <sup>-</sup> mutant lines that have white eye color ( <i>kh</i> <sup>-</sup> ) and yellow body color ( <i>yellow</i> <sup>-</sup> ).                                                                                                                                                                          | (Liu et al. 2019)       |

|                                     |                              |                                                                                                                                                                                                                                                                                                                                                                                                                                       |                                  |
|-------------------------------------|------------------------------|---------------------------------------------------------------------------------------------------------------------------------------------------------------------------------------------------------------------------------------------------------------------------------------------------------------------------------------------------------------------------------------------------------------------------------------|----------------------------------|
|                                     | <i>C. quinquefasciatus</i>   | Multiple <i>kmo</i> <sup>-</sup> mutant lines. Mutant mosquitoes have white eye color as larvae, pupae, and adults.                                                                                                                                                                                                                                                                                                                   | (Anderson et al. 2019)           |
|                                     | <i>C. quinquefasciatus</i>   | Multiple <i>white</i> <sup>-</sup> mutant lines that have white eye color as adults.                                                                                                                                                                                                                                                                                                                                                  | (Li et al. 2020)                 |
|                                     | <i>C.</i>                    | Video demonstration of embryo microinjection technique and production of CRISPR-Cas9 mutations by using <i>cycle</i> ( <i>Cx. quinq</i> , <i>XP_001865023.1</i> ) as an example.                                                                                                                                                                                                                                                      | (Meuti and Harrell 2020)         |
| CRISPR-Cas9 knockout and knock-in   | <i>A. gambiae</i>            | <i>IR21a</i> <sup>-</sup> and <i>IR21</i> <sup>3xP3-EYFP</sup> ionotropic receptor gene mutant lines. <i>IR21</i> <sup>3xP3-EYFP</sup> lines is marked with <i>EYFP</i> expressed in the eyes. Mutant mosquitoes have reduced heat-seeking.                                                                                                                                                                                           | (Greppi et al. 2020)             |
|                                     | <i>A. gambiae (coluzzii)</i> | <i>ORCO</i> <sup>3xP3-DsRed</sup> olfactory receptor co-receptor mutant lines, marked with <i>DsRed</i> expressed in the eyes. Mutant mosquitoes have reduced olfactory perception.                                                                                                                                                                                                                                                   | (Sun et al. 2020)                |
|                                     | <i>A. funestus</i>           | <i>white</i> <sup>actin5c-ECFP</sup> mutants that have white eye color as larvae, pupae, and adults. Mutant animals are marked with <i>ECFP</i> expressed in the midgut and gastric caecae.                                                                                                                                                                                                                                           | (Quinn et al. 2021)              |
|                                     | <i>Ae. aegypti</i>           | <i>IR8a</i> <sup>pUb-DsRed</sup> and <i>IR8a</i> <sup>attP</sup> mutant lines in the ionotropic receptor <i>IR8a</i> . <i>IR8a</i> <sup>pUb-DsRed</sup> mosquitoes are marked with <i>DsRed</i> expression in the eyes. The mutant mosquitoes have reduced attraction to the smell of lactic acid and other volatile acids.                                                                                                           | (Raji et al. 2019)               |
|                                     | <i>Ae. aegypti</i>           | Truncated version of <i>fruitless</i> isoform, marked with <i>T2A-CsChrimson:tdTomato</i> .                                                                                                                                                                                                                                                                                                                                           | (Basrur et al. 2020)             |
|                                     | <i>Ae. aegypti</i>           | <i>op1</i> <sup>3xP3-GFP</sup> , <i>op1</i> <sup>3xP3-DsRed</sup> , <i>op2</i> <sup>3xP3-GFP</sup> , and <i>op2</i> <sup>3xP3-DsRed</sup> mutants in the photoreceptors genes <i>op1</i> and <i>op2</i> . Every mutant line was labeled with GFP or DsRed expressed in the eyes. Double mutants <i>op1</i> <sup>-</sup> , <i>op2</i> <sup>-</sup> have impaired vision-guided target attraction in CO <sub>2</sub> -dependent manner. | (Zhan et al. 2021)               |
|                                     | <i>C. quinquefasciatus</i>   | Generated <i>Vasa-Cas9</i> (marked with <i>Opie2-DsRed</i> ) knock-in into <i>cardinal</i> ( <i>CPIJ005949</i> ) gene, mutating the gene and leading to an eye color phenotype. Also generated <i>kh</i> <sup>-</sup> knockout mutant with white eye phenotype.                                                                                                                                                                       | (Feng et al. 2021)               |
|                                     | <i>C. quinquefasciatus</i>   | <i>kmo</i> <sup>Hr5/IE1-DsRed, 7SK-sgRNA</sup> mutant lines. Mutant animals are marked with <i>DsRed</i> expression in the body. Homozygous mutant larvae have white eye color but don't survive to pupariation.                                                                                                                                                                                                                      | (Purusothaman et al. 2021)       |
| CRISPR-Cas9 knockout; ReMOT Control | <i>A. stephensi</i>          | Successfully targeted <i>ECFP</i> gene, expressed in the original transgenic line. Mutants were made by employing ReMOT Control method of injection.                                                                                                                                                                                                                                                                                  | (Macias et al. 2020)             |
|                                     | <i>Ae. aegypti</i>           | <i>kmo</i> <sup>-</sup> mutants, generated with ReMOT Control method of injection. In addition, demonstrated the efficiency of P2C peptide in five other mosquito species.                                                                                                                                                                                                                                                            | (Chaverra-Rodriguez et al. 2018) |
|                                     | <i>C. pipiens</i>            | <i>kmo</i> <sup>-</sup> mutants, generated with ReMOT Control method of injection.                                                                                                                                                                                                                                                                                                                                                    | (Li et al. 2021)                 |

|                                           |                        |                                                                                                                                                                                                                                                                                                                       |                           |
|-------------------------------------------|------------------------|-----------------------------------------------------------------------------------------------------------------------------------------------------------------------------------------------------------------------------------------------------------------------------------------------------------------------|---------------------------|
| Random transgenesis                       | <i>A. stephensi</i>    | <i>Minos</i> transposon-mediated integration of <i>actin-EGFP</i> transgene.                                                                                                                                                                                                                                          | (Catteruccia et al. 2000) |
|                                           | <i>A. gambiae</i>      | <i>piggyBac</i> -mediated integration of <i>Hr5/IE1-EGFP</i> transgene.                                                                                                                                                                                                                                               | (Grossman et al. 2001)    |
|                                           | <i>A. albimanus</i>    | <i>piggyBac</i> -mediated integration of <i>Dm_pUb-EGFP</i> transgene.                                                                                                                                                                                                                                                | (Perera et al. 2002)      |
|                                           | <i>Ae. aegypti</i>     | <i>Hermes</i> -mediated integration of <i>Drosophila cinnabar (cn)</i> gene to rescue white eye phenotype of <i>kh-</i> mutant line.                                                                                                                                                                                  | (Jasinskiene et al. 1998) |
|                                           | <i>Ae. aegypti</i>     | <i>Mariner</i> -mediated integration of <i>Drosophila cinnabar (cn)</i> gene to rescue white eye phenotype of <i>kh-</i> mutant line.                                                                                                                                                                                 | (Coates et al. 1998)      |
|                                           | <i>Ae. aegypti</i>     | <i>piggyBac</i> -mediated integration of <i>PUB-GCamp6s</i> transgene marked with <i>OpIE2-DsRed</i> . Transgenic larvae were used for live $Ca^{2+}$ imaging from muscles and neuronal tissue.                                                                                                                       | (Bui et al. 2019)         |
|                                           | <i>Ae. aegypti</i>     | <i>piggyBac</i> -mediated integration of <i>CPA-antiZIKV_smallRNAs_array</i> marked with <i>3xP3-tdTomato</i> . Transgenic mosquitoes expressed Zika virus-targeting small RNAs under the control of blood-meal activated carboxypeptidase A (CPA) midgut promoter.                                                   | (Buchman et al. 2019)     |
|                                           | <i>Ae. aegypti</i>     | <i>piggyBac</i> -mediated integration of <i>QUAS-CsChrimson::tdTomato</i> transgene for neuronal labeling and optogenetics when crossed with a QF2 driver.                                                                                                                                                            | (Sorrells et al. 2021)    |
|                                           | <i>Ae. fluviatilis</i> | <i>piggyBac</i> -mediated integration of <i>3xP3-EGFP</i> transgene.                                                                                                                                                                                                                                                  | (Rodrigues et al. 2006)   |
| Random transgenesis; CRISPR-Cas9 knockout | <i>Ae. aegypti</i>     | <i>Mos1</i> -mediated integration of <i>Nix_promoter-Nix</i> construct marked with <i>PUB-GFP</i> . Overexpression of <i>Nix</i> led to sex-conversion of females into males, and to an unexpected flightless male phenotype. To investigate this phenotype, myo-sex gene was targeted by CRISPR-Cas9.                | (Aryan et al. 2020)       |
| Random and site-directed transgenesis     | <i>A. gambiae</i>      | Produced an <i>attP</i> line, marked with <i>3xP3-ECFP</i> . Used it to integrate <i>AgCP-VIDA3</i> construct, marked with <i>3xP3-DsRed</i> .                                                                                                                                                                        | (Meredith et al. 2011)    |
|                                           | <i>A. gambiae</i>      | <i>piggyBac</i> -mediated integration of <i>nanos_promoter-modified_phiC31_integrase-attP</i> transgene marked with <i>Hr5/IE1-DsRed2</i> to create a self-docking line for site-directed transgenesis. The resulting <i>attP</i> lines were subsequently used for integration of a <i>pattB-3xP3-ECFP</i> transgene. | (Meredith et al. 2013)    |
|                                           | <i>Ae. aegypti</i>     | <i>Mos1</i> -mediated integration of <i>CPA-EGFP</i> transgene, marked with <i>3xP3-EGFP</i> . Transgenic mosquitoes expressed EGFP under the control of blood-meal activated carboxypeptidase A (CPA) midgut promoter.                                                                                               | (Franz et al. 2011)       |

|                                                |                       |                                                                                                                                                                                                                                                                                                                                                                                                                                                                                                                                                      |                           |
|------------------------------------------------|-----------------------|------------------------------------------------------------------------------------------------------------------------------------------------------------------------------------------------------------------------------------------------------------------------------------------------------------------------------------------------------------------------------------------------------------------------------------------------------------------------------------------------------------------------------------------------------|---------------------------|
|                                                |                       | <i>piggyBac</i> -mediated integration of <i>attP</i> transgene marked with <i>3xP3-ECFP</i> . This line was later used to integrate <i>pattB-3xP3-DsRed</i> , <i>pattB-3xP3-DsRed-CPA-EGFP</i> and <i>pattB-3xP3-DsRed-PUB-v5B2</i> transgenes into a previously characterized attP26 site.                                                                                                                                                                                                                                                          |                           |
|                                                | <i>Ae. aegypti</i>    | <i>Mos1</i> -mediated integration of <i>hsp83-DsRed</i> or <i>hsp83-ZsGreen</i> transgenes, marked with <i>3xP3-DsRed</i> . Demonstrates the utility of <i>hsp83-FluoGeneX</i> construct as a new fluorescent marker.                                                                                                                                                                                                                                                                                                                                | (Webster and Scott 2021)  |
|                                                | <i>Ae. albopictus</i> | <i>piggyBac</i> -mediated integration of <i>3xP3-ECFP</i> and <i>attP</i> transgenes. The <i>3xP3-ECFP,attP</i> lines were subsequently successfully used for site-specific integration of <i>3xP3-DsRed</i> transgene.                                                                                                                                                                                                                                                                                                                              | (Labbé et al. 2010)       |
| Tools for transgenesis                         | <i>A. gambiae</i>     | This paper describes numerous plasmids, markers, etc. used by the authors for transgenesis of <i>A. gambiae</i> .                                                                                                                                                                                                                                                                                                                                                                                                                                    | (Volohonsky et al. 2015)  |
| TetOn/Off system;<br>Random transgenesis       | <i>A. stephensi</i>   | <i>SRPN10-tTA</i> and <i>SRPN10-rtTA</i> doxycycline-sensitive driver lines, specific to midgut, hemocytes, and pericardial cells. These lines were marked with <i>actin5c-EGFP</i> and randomly integrated via <i>Mos1</i> -mediated transgenesis.<br><i>tetOP-LacZ</i> reporter line, marked with <i>actin5c-dsRed</i> and randomly integrated via <i>Mos1</i> -mediated transgenesis.                                                                                                                                                             | (Lycett et al. 2004)      |
| GAL4/UAS system;<br>Random transgenesis        | <i>A. gambiae</i>     | <i>CP (carboxypeptidase)-GAL4DBD::VP16</i> driver line, specific to midgut, marked with <i>3xP3-DsRed</i> and <i>UAS-Luciferase, UAS-eYFP</i> reporter line, marked with <i>3xP3-eCFP</i> . Both constructs were randomly integrated via <i>piggyBac</i> -mediated transgenesis.                                                                                                                                                                                                                                                                     | (Lynd and Lycett 2012)    |
| GAL4/UAS system;<br>Site-directed transgenesis | <i>A. gambiae</i>     | <i>HSP-GAL4</i> driver line, produced by enhancer-trapping and marked with <i>3xP3-eYFP</i> and <i>UAS-Cyp4g16_RNAi</i> or <i>UAS-Cyp4g17_RNAi</i> reporter lines, marked with <i>3xP3-eYFP</i> . Both constructs were integrated via <i>phiC31</i> site-directed transgenesis.                                                                                                                                                                                                                                                                      | (Lynd et al. 2019)        |
| GAL4/UAS system;<br>Random transgenesis        | <i>A. stephensi</i>   | Established several driver ( <i>PB-GAL4</i> , marked with <i>3xP3-ECFP</i> ) and reporter ( <i>UAS-tdTomato</i> , marked with <i>3xP3-eYFP</i> ) lines via <i>piggyBac</i> -mediated random transgenesis. Also established <i>hsp70-piggyBac_transposase</i> marked with <i>3xP3-DsRed</i> via <i>Minos</i> -mediated random transgenesis. By crossing <i>GAL4</i> and <i>piggyBac_transposase</i> lines, re-mobilized <i>GAL4</i> and recovered several <i>GAL4</i> enhancer-trap lines with strong expression in various larval and adult tissues. | (O'Brochta et al. 2012)   |
| GAL4/UAS system;<br>Random transgenesis        | <i>Ae. aegypti</i>    | <i>Vg (vitellogenin)-GAL4Δ</i> driver line, specific to fat body, marked with <i>3xP3-EGFP</i> , and <i>UAS-EGFP</i> reporter line, marked with <i>3xP3-DsRed</i> . Both constructs were randomly integrated via <i>piggyBac</i> -mediated transgenesis.                                                                                                                                                                                                                                                                                             | (Kokoza and Raikhel 2011) |

|                                                                                          |                    |                                                                                                                                                                                                                                                                                                                                                                                                                                                                           |                         |
|------------------------------------------------------------------------------------------|--------------------|---------------------------------------------------------------------------------------------------------------------------------------------------------------------------------------------------------------------------------------------------------------------------------------------------------------------------------------------------------------------------------------------------------------------------------------------------------------------------|-------------------------|
| GAL4/UAS system;<br>Q-system;<br>Random transgenesis;<br>CRISPR-Cas9 knock-in            | <i>Ae. aegypti</i> | Generated <i>Syt1:GCaMP6s</i> , <i>Syt1-T2A-3XGCaMP6s</i> , <i>brp-T2A-QF2<sup>w</sup></i> , <i>Syt1-T2A-QF2-QUAS-GCaMP6s</i> , and <i>Syt1-T2A-GAL4d-UAS-GCaMP6s</i> by CRISPR-Cas9 knock-in for pan-neuronal live imaging. Also generated <i>QUAS-Syt1:tdTomato</i> reported line by <i>piggyBac</i> transgenesis.                                                                                                                                                      | (Zhao et al. 2021)      |
| Q-system;<br>Random transgenesis                                                         | <i>A. gambiae</i>  | <i>piggyBac</i> -mediated integration of <i>Orco-QF2</i> and <i>QUAS-GFP</i> transgenes, marked with 3xP3-DsRed and 3xP3-ECFP, respectively. Animals that contain both transgenes express GFP specifically in the olfactory <i>Orco+</i> neurons.                                                                                                                                                                                                                         | (Riabinina et al. 2016) |
| Q-system;<br>Random transgenesis                                                         | <i>A. gambiae</i>  | <i>piggyBac</i> -mediated integration of <i>QUAS-GCamp6f</i> transgene that, when crossed to <i>Orco-QF2</i> line, was used for live Ca <sup>2+</sup> imaging specifically from <i>Orco+</i> neurons.                                                                                                                                                                                                                                                                     | (Afify et al. 2019)     |
| Q-system;<br>Site-directed transgenesis                                                  | <i>A. gambiae</i>  | <i>Amt-QF2</i> driver line, specific to the cells that express ammonium transporter, marked with 3xP3-DsRed and integrated in a site-directed manner.                                                                                                                                                                                                                                                                                                                     | (Ye et al. 2020)        |
| Q-system;<br>CRISPR-Cas9 knockout and knock-in                                           | <i>A. gambiae</i>  | QF2 driver line <i>IR76b-QF2</i> marked with 3xP3-DsRed. <i>IR76b<sup>-</sup></i> mutant, generated by CRISPR-Cas9 insertion of 3xP3-DsRed in the first exon.                                                                                                                                                                                                                                                                                                             | (Ye et al. 2021)        |
| Q-system;<br>Random transgenesis;<br>CRISPR-Cas9 knockout and knock-in                   | <i>Ae. aegypti</i> | <i>ppk301-T2A-QF2</i> driver line that expresses <i>QF2</i> under the control of endogenous <i>ppk301</i> enhancer and promoter, marked with 3xP3-DsRed. The <i>T2A-QF2</i> cassette was introduced via CRISPR-Cas9 induced break and subsequent homology-directed repair (HDR). Two reporter lines ( <i>15x-QUAS-dTomato-T2A-GCaMP6s</i> , marked with 3xP3-DsRed, and <i>15x-QUAS-mCD8:GFP</i> , marked with 3xP3-ECFP) were generated via a <i>piggyBac</i> insertion. | (Matthews et al. 2019)  |
| Q-system;<br>Random and site-directed transgenesis;<br>CRISPR-Cas9 knockout and knock-in | <i>Ae. aegypti</i> | <i>Mos1</i> -mediated integration of <i>QUAS-mCD8:GFP</i> and of <i>QUAS-CAMPARI2</i> transgenes, marked with 3xP3-ECFP. CRISPR-Cas9 was used to produce knock-in driver lines <i>Orco-QF2</i> , <i>IR8a-QF2</i> , and <i>GR1-QF2</i> with and without 3xP3-DsRed marker.                                                                                                                                                                                                 | (Shankar et al. 2020)   |



|                                                                                 |                            |                                                                                                                                                                                                                                                                                                                                                                                                                                                                                                                                                                                                                                                                                                                            |                                  |
|---------------------------------------------------------------------------------|----------------------------|----------------------------------------------------------------------------------------------------------------------------------------------------------------------------------------------------------------------------------------------------------------------------------------------------------------------------------------------------------------------------------------------------------------------------------------------------------------------------------------------------------------------------------------------------------------------------------------------------------------------------------------------------------------------------------------------------------------------------|----------------------------------|
| Q-system;<br>Random<br>transgenesis;<br>CRISPR-Cas9<br>knockout and<br>knock-in | <i>Ae. aegypti</i>         | Four driver lines <i>Brp-T2A-QF2</i> , <i>Gr4-T2A-QF2</i> , <i>Ir7a-T2A-QF2</i> , and <i>Ir7f-T2A-QF2</i> driver lines that express QF2 under the control of endogenous <i>Brp/GR4/IR7a/IR7f</i> enhancers and promoters, respectively, marked with <i>3xP3-DsRed</i> . The <i>T2A-QF2</i> cassette was introduced via CRISPR-Cas9 induced break and subsequent HDR.<br><i>15xQUAS-dTomato-T2A-TRPV1/GCaMP6s</i> reporter line that expresses both the dTomato fluorophore and the TRPV1 channel for chemogenetics or <i>GCaMP6s</i> for live imaging, generated via a <i>piggyBac</i> insertion.<br><i>IR7a<sup>-</sup></i> and <i>IR7f</i> mutant lines with impaired chemosensation, generated by CRISPR-Cas9 knockout. | (Jové et al. 2020)               |
| Q-system;<br>CRISPR-Cas9<br>knockout and<br>knock-in                            | <i>Ae. aegypti</i>         | Integrated driver+reporter line <i>Orco-T2A-QF2-9xQUAS-GCaMP6f</i> , marked with 3XP3-dsRed. This line expresses QF2, and consequently, GCaMP6f, in Orco+ olfactory neurons under the control of endogenous <i>Orco</i> enhancer and promoter. The <i>T2A-QF2-9xQUAS-GCaMP6f</i> cassette was introduced via CRISPR-Cas9 induced break and subsequent HDR.                                                                                                                                                                                                                                                                                                                                                                 | (Zhao et al. 2020)               |
| Q-system;<br>split-QF;<br>CRISPR-Cas9<br>knockout and<br>knock-in               | <i>Ae. aegypti</i>         | QF2 driver lines <i>IR25a-T2A-QF2</i> , <i>IR76b-T2A-QF2</i> , <i>IR8a-T2A-QF2</i> , <i>GR3-T2A-QF2</i> , and <i>Ir25a-T2A-QF2</i> that express QF2 under the control of endogenous enhancers and promoters, respectively, marked with <i>3xP3-DsRed</i> . The same approach was used to create split-QF drivers <i>Ir25a-T2A-QF.AD::Zip+</i> , marked with 3xP3-eYFP, and <i>Orco-T2A-Zip-::QF.DBD</i> , marked with <i>3xP3-dsRed</i> .                                                                                                                                                                                                                                                                                  | (Younger et al. 2020)            |
|                                                                                 | <i>A. gambiae</i>          | Video demonstration of embryo microinjection technique.                                                                                                                                                                                                                                                                                                                                                                                                                                                                                                                                                                                                                                                                    | (Carballar-Lejarazú et al. 2021) |
|                                                                                 | <i>C. quinquefasciatus</i> | Video demonstration of embryo microinjection technique.                                                                                                                                                                                                                                                                                                                                                                                                                                                                                                                                                                                                                                                                    | (Bui et al. 2020)                |

**Table S3. Summary of CRISPR-Cas9 gene drives in mosquitoes**

| Drive Name          | Species             | Type                   | Genomic Target(s)             | Construct Elements                                                                                                                                                                                                                                  | Result                                                                                                                                                                                                                                                                                  | Average Drive Spread in Caged Populations                                                                                                            | Functional Resistance? | Reference             |
|---------------------|---------------------|------------------------|-------------------------------|-----------------------------------------------------------------------------------------------------------------------------------------------------------------------------------------------------------------------------------------------------|-----------------------------------------------------------------------------------------------------------------------------------------------------------------------------------------------------------------------------------------------------------------------------------------|------------------------------------------------------------------------------------------------------------------------------------------------------|------------------------|-----------------------|
| AsMCRkh2            | <i>A. stephensi</i> | Population replacement | <i>Kynurenine hydroxylase</i> | Cas9 under Vasa promoter, gRNA, DsRed fluorescent marker under 3xP3 promoter, dual anti- <i>Plasmodium falciparum</i> single-chain antibodies (m2A10 under <i>AsVg1</i> promoter, and m1C3 under <i>AgCPA</i> promoter), flanking homology regions. | Anti- <i>Plasmodium falciparum</i> single-chain antibodies were transcriptionally active upon blood feeding. Although the effects on <i>P. falciparum</i> were not tested, these antibodies have previously been shown to abolish <i>P. falciparum</i> infectivity (Isaacs et al. 2012) | ~99.5% inheritance.                                                                                                                                  | Yes                    | Gantz et al. 2015)    |
| CRISPR <sup>h</sup> | <i>A. gambiae</i>   | Population suppression | AGAP005958                    | Cas9 under <i>vasa2</i> promoter, gRNA under <i>U6</i> promoter, RFP marker under 3xP3 promoter, <i>attP</i> sites to facilitate insertion, homology regions.                                                                                       | Females homozygous for drive-disrupted AGAP005958 did not lay eggs. Heterozygotes did not produce viable larvae.                                                                                                                                                                        | 94% homing rates from male parents. No larvae recovered from female parents. Costs outweigh homing rate, so expected to disappear from a population. | Yes                    | (Hammond et al. 2016) |

|                                                         |                   |                        |            |                                                                                                                                                                             |                                                                                                                                                                                                                                                                                                                                                                                                      |                                                                                                                                                                                                                                           |     |                                            |
|---------------------------------------------------------|-------------------|------------------------|------------|-----------------------------------------------------------------------------------------------------------------------------------------------------------------------------|------------------------------------------------------------------------------------------------------------------------------------------------------------------------------------------------------------------------------------------------------------------------------------------------------------------------------------------------------------------------------------------------------|-------------------------------------------------------------------------------------------------------------------------------------------------------------------------------------------------------------------------------------------|-----|--------------------------------------------|
| CRISPR <sup>h</sup>                                     | <i>A. gambiae</i> | Population suppression | AGAP007280 | <i>Cas9</i> under <i>vasa2</i> promoter, gRNA under <i>U6</i> promoter, RFP marker under <i>3xP3</i> promoter, <i>attP</i> sites to facilitate insertion, homology regions. | Females homozygous for drive-disrupted AGAP007280 laid eggs which did not hatch. Heterozygous females' larvae production was 9.3% of wild type.                                                                                                                                                                                                                                                      | 98% homing rates from both male and female parents. Starting at 50%, drive reached 75.1% frequency over four generations. When this drive was tested for 25 generations, it was found to decline to below 25% frequency by generation 25. | Yes | (Hammond et al. 2016; Hammond et al. 2017) |
| CRISPR <sup>h</sup>                                     | <i>A. gambiae</i> | Population suppression | AGAP011377 | <i>Cas9</i> under <i>vasa2</i> promoter, gRNA under <i>U6</i> promoter, RFP marker under <i>3xP3</i> promoter, <i>attP</i> sites to facilitate insertion, homology regions. | Females homozygous for drive-disrupted AGAP011377 did not lay eggs. Heterozygous females' larvae production was 4.6% of wild type.                                                                                                                                                                                                                                                                   | Homing rates of 85% for male parents, and 69% for female parents. Costs outweigh homing rate, so expected to disappear from a population.                                                                                                 | Yes | (Hammond et al. 2016)                      |
| Ag(QFS)1<br>(previously <i>dsxF<sup>CRISPRh</sup></i> ) | <i>A. gambiae</i> | Population suppression | Doublesex  | <i>Cas9</i> under <i>vasa</i> promoter, gRNA under <i>U6</i> promoter, RFP marker under <i>3xP3</i> promoter, <i>attP</i> sites to facilitate insertion, homology regions.  | Heterozygous males were unaffected. Heterozygous females showed 49.8% fecundity of wild type—this was worsened when inherited from a male parent (21.7%) rather than a female (64.9%). Homozygous females replaced by non-biting, infertile, intersex phenotype. Resulting in complete population collapse, even in large cages containing age-structured populations resembling natural conditions. | Inheritance rates of 95.9% for heterozygous male parents, and 99.4% for heterozygous female parents. Drive reached 100% prevalence in caged populations.                                                                                  | No  | (Kyrou et al. 2018; Hammond et al. 2021)   |

|                          |                    |                        |              |                                                                                                                                                                       |                                                                                      |                                                                                                                                      |     |                  |
|--------------------------|--------------------|------------------------|--------------|-----------------------------------------------------------------------------------------------------------------------------------------------------------------------|--------------------------------------------------------------------------------------|--------------------------------------------------------------------------------------------------------------------------------------|-----|------------------|
| U6a-GDe <i>exu</i> -Cas9 | <i>Ae. aegypti</i> | Population replacement | <i>white</i> | gRNA under the U6a promoter; tdTomato marker under <i>3xP3</i> promoter; homology arms. A separate construct contained <i>Cas9</i> driven by the <i>exu</i> promoter. | Mosquitoes carrying the drive showed the red eye marker.                             | Female parents: 61.3% inheritance rates. Male parents: no significant difference from Mendelian rates ( <i>white</i> is sex-linked). | Yes | (Li et al. 2020) |
| U6b-GDe <i>exu</i> -Cas9 | <i>Ae. aegypti</i> | Population replacement | <i>white</i> | gRNA under the U6b promoter; tdTomato marker under <i>3xP3</i> promoter; homology arms. A separate construct contained <i>Cas9</i> driven by the <i>exu</i> promoter. | Mosquitoes carrying the drive showed the red eye marker.                             | Female parents: 70.9% inheritance rates. Male parents: no significant difference from Mendelian rates ( <i>white</i> is sex-linked). | Yes | (Li et al. 2020) |
| U6c-GDe <i>exu</i> -Cas9 | <i>Ae. aegypti</i> | Population replacement | <i>white</i> | gRNA under the U6c promoter; tdTomato marker under <i>3xP3</i> promoter; homology arms. A separate construct contained <i>Cas9</i> driven by the <i>exu</i> promoter. | Mosquitoes carrying the drive showed the red eye marker. Showed low drive potential. | Female parents: 55.8% inheritance rates. Male parents: no significant difference from Mendelian rates ( <i>white</i> is sex-linked). | Yes | (Li et al. 2020) |
| U6d-GDe <i>exu</i> -Cas9 | <i>Ae. aegypti</i> | Population replacement | <i>white</i> | gRNA under the U6d promoter; tdTomato marker under <i>3xP3</i> promoter; homology arms. A separate construct contained <i>Cas9</i> driven by the <i>exu</i> promoter. | Mosquitoes carrying the drive showed the red eye marker. Showed low drive potential. | Female parents 52.5% inheritance rates. Male parents: no significant difference from Mendelian rates ( <i>white</i> is sex-linked).  | Yes | (Li et al. 2020) |
| U6b-GDe 4nitro-Cas9      | <i>Ae. aegypti</i> | Population replacement | <i>white</i> | gRNA under the U6b promoter; tdTomato marker under <i>3xP3</i> promoter; homology arms. A separate construct contained <i>Cas9</i> driven by the 4nitro promoter.     | Mosquitoes carrying the drive showed the red eye marker.                             | No significant difference from Mendelian rates.                                                                                      | Yes | (Li et al. 2020) |

|                        |                    |                           |              |                                                                                                                                                                                             |                                                                                                                                                                           |                                                                                                                                                      |                     |                                |
|------------------------|--------------------|---------------------------|--------------|---------------------------------------------------------------------------------------------------------------------------------------------------------------------------------------------|---------------------------------------------------------------------------------------------------------------------------------------------------------------------------|------------------------------------------------------------------------------------------------------------------------------------------------------|---------------------|--------------------------------|
| U6b-GDe<br>trunk-Cas9  | <i>Ae. aegypti</i> | Population<br>replacement | <i>white</i> | gRNA under the U6b promoter;<br>tdTomato marker under <i>3xP3</i><br>promoter; homology arms.<br>A separate construct contained<br><i>Cas9</i> driven by the <i>trunk</i><br>promoter.      | Mosquitoes carrying the drive<br>showed the red eye marker.                                                                                                               | No significant difference<br>from Mendelian rates.                                                                                                   | Yes                 | (Li et<br>al.<br>2020)         |
| U6b-GDe<br>nup50-Cas9  | <i>Ae. aegypti</i> | Population<br>replacement | <i>white</i> | gRNA under the U6b promoter;<br>tdTomato marker under <i>3xP3</i><br>promoter; homology arms.<br>A separate construct contained<br><i>Cas9</i> driven by the <i>nup50</i><br>promoter.      | Mosquitoes carrying the drive<br>showed the red eye marker.<br>Female fecundity reduced by<br>~21.6%.                                                                     | Female parents: 80.5%<br>inheritance rates.<br>Male parents: 66.9%<br>inheritance rates.                                                             | Yes                 | (Li et<br>al.<br>2020)         |
| U6b-GDe ubiq-<br>Cas9  | <i>Ae. aegypti</i> | Population<br>replacement | <i>white</i> | gRNA under the U6b promoter;<br>tdTomato marker under <i>3xP3</i><br>promoter; homology arms.<br>A separate construct contained<br><i>Cas9</i> driven by the <i>ubiq</i><br>promoter.       | Mosquitoes carrying the drive<br>showed the red eye marker.                                                                                                               | Female parents: 65.5%<br>inheritance rates.<br>Male parents: no<br>significant difference<br>from Mendelian rates<br>( <i>white</i> is sex-linked).  | Yes                 | (Li et<br>al.<br>2020)         |
| SDGD <sup>011377</sup> | <i>A. gambiae</i>  | Population<br>suppression | AGAP011377   | <i>Cas9</i> under <i>vasa</i> promoter, gRNA<br>under <i>U6</i> promoter, <i>DsRed</i><br>marker under <i>3xP3</i> promoter, I-<br>Ppol- <i>eGFP</i> fusion under <i>Beta2</i><br>promoter. | Reduced fertility in females<br>heterozygous for the drive. In a<br>caged population, maintained a sex<br>ratio of ~65% males, causing partial<br>population suppression. | Average inheritance rate<br>of 79%. When starting at<br>12.5% allele frequency,<br>stable for eight<br>generations but did not<br>completely spread. | Not<br>repo<br>rted | (Simo<br>ni et<br>al.<br>2020) |
| SDGD <sup>007280</sup> | <i>A. gambiae</i>  | Population<br>suppression | AGAP007280   | <i>Cas9</i> under <i>vasa</i> promoter, gRNA<br>under <i>U6</i> promoter, <i>DsRed</i><br>marker under <i>3xP3</i> promoter, I-<br>Ppol- <i>eGFP</i> fusion under <i>Beta2</i><br>promoter. | Heterozygotes had severely<br>reduced fertility.                                                                                                                          | Insufficient larvae<br>recovered to assess drive<br>activity.                                                                                        | Not<br>repo<br>rted | (Simo<br>ni et<br>al.<br>2020) |

|                        |                     |                        |                               |                                                                                                                                                                                                                      |                                                                                                                                                                                                                                                                                                                       |                                                                                                                                                                                                                          |              |                      |
|------------------------|---------------------|------------------------|-------------------------------|----------------------------------------------------------------------------------------------------------------------------------------------------------------------------------------------------------------------|-----------------------------------------------------------------------------------------------------------------------------------------------------------------------------------------------------------------------------------------------------------------------------------------------------------------------|--------------------------------------------------------------------------------------------------------------------------------------------------------------------------------------------------------------------------|--------------|----------------------|
| SDGD <sup>005958</sup> | <i>A. gambiae</i>   | Population suppression | AGAP005958                    | <i>Cas9</i> under <i>vasa</i> promoter, gRNA under <i>U6</i> promoter, <i>DsRed</i> marker under 3xP3 promoter, I-Ppol- <i>eGFP</i> fusion under <i>Beta2</i> promoter.                                              | Reduced fertility in males and females heterozygous for the drive.                                                                                                                                                                                                                                                    | Average inheritance rate of 98%. High fertility costs caused drive to vanish from a caged population after two generations when starting at 12.5% allele frequency.                                                      | Not reported | (Simoni et al. 2020) |
| SDGD <sup>dsx</sup>    | <i>A. gambiae</i>   | Population suppression | <i>Doublesex</i>              | <i>Cas9</i> under <i>zpg</i> promoter, gRNA under <i>U6</i> promoter, I-Ppol under <i>Beta2</i> promoter, <i>DsRed</i> under 3xP3 promoter.                                                                          | <i>Doublesex</i> disrupted with the X-chromosome-shredding endonuclease I-Ppol. No impact on fertility of male heterozygotes. Female heterozygotes had viable offspring reduced by ~30% compared to wild type. Drive led to a male-only population. Complete population collapse.                                     | Inheritance rates of 96% from male parents and 99.9% from females. Drive prevalence reached 100% in caged populations starting at 2.5% allele prevalence (9–13 generations) and 25% allele prevalence (5–6 generations). | No           | (Simoni et al. 2020) |
| Reckh                  | <i>A. stephensi</i> | Population replacement | <i>Kynurenine hydroxylase</i> | <i>Cas9</i> under <i>vasa</i> promoter, gRNA under <i>U6A</i> promoter, <i>GFP</i> under 3xP3 promoter, recoded <i>Kynurenine hydroxylase</i> sequence, <i>attP</i> sites to facilitate insertion, homology regions. | The drive disrupted <i>kynurenine hydroxylase</i> and provided a rescue sequence. Most females carrying mutated non-functional resistance alleles that did not inherit the drive lacked this rescue sequence, resulting in reduced survival, fertility, and fecundity. One functional resistance allele was reported. | ~99.8% inheritance from male parents, ~57% inheritance from female parents. ≥95% (one cage had just >90%).                                                                                                               | Yes          | (Adolfi et al. 2020) |

|                               |                   |                        |            |                                                                                                                                                                           |                                                                                                     |                                                                                                                                                                                                                                               |     |                       |
|-------------------------------|-------------------|------------------------|------------|---------------------------------------------------------------------------------------------------------------------------------------------------------------------------|-----------------------------------------------------------------------------------------------------|-----------------------------------------------------------------------------------------------------------------------------------------------------------------------------------------------------------------------------------------------|-----|-----------------------|
| <i>zpg-CRISPR<sup>h</sup></i> | <i>A. gambiae</i> | Population suppression | AGAP007280 | <i>Cas9</i> under <i>zpg</i> promoter, gRNA under <i>U6</i> promoter, RFP marker under <i>3xP3</i> promoter, <i>attP</i> sites to facilitate insertion, homology regions. | Female egg production suppressed by an average of 92% during or just after peak in drive frequency. | Females: 97.8% (paternal inheritance) and 99.1% (maternal inheritance). Males: 93.5% (paternal inheritance) and 90.6% (maternal inheritance). Reached >95% of population in 4–10 generations, then declined due to resistant alleles forming. | Yes | (Hammond et al. 2021) |
| <i>nos-CRISPR<sup>h</sup></i> | <i>A. gambiae</i> | Population suppression | AGAP007280 | <i>Cas9</i> under <i>nos</i> promoter, gRNA under <i>U6</i> promoter, RFP marker under <i>3xP3</i> promoter, <i>attP</i> sites to facilitate insertion, homology regions. | No reported cage trial.                                                                             | Females: 97.8% (paternal inheritance) and 85.2% (maternal inheritance). Males: 99.1% (paternal inheritance) and 83.6% (maternal inheritance).                                                                                                 | Yes | (Hammond et al. 2021) |
| <i>exu-CRISPR<sup>h</sup></i> | <i>A. gambiae</i> | Population suppression | AGAP007280 | <i>Cas9</i> under <i>exu</i> promoter, gRNA under <i>U6</i> promoter, RFP marker under <i>3xP3</i> promoter, <i>attP</i> sites to facilitate insertion, homology regions. | No reported cage trial.                                                                             | No drive produced in females. For males, homing rates of 65% (paternal inheritance) and 63.1% (maternal inheritance).                                                                                                                         | Yes | (Hammond et al. 2021) |

|                     |                   |                        |    |                                                                                                                                                                                                                                                                                                                                                                                                                                                                                                                                                                                                                |                                                                                                                                                                                                                                                                                         |                                                                                     |     |                        |
|---------------------|-------------------|------------------------|----|----------------------------------------------------------------------------------------------------------------------------------------------------------------------------------------------------------------------------------------------------------------------------------------------------------------------------------------------------------------------------------------------------------------------------------------------------------------------------------------------------------------------------------------------------------------------------------------------------------------|-----------------------------------------------------------------------------------------------------------------------------------------------------------------------------------------------------------------------------------------------------------------------------------------|-------------------------------------------------------------------------------------|-----|------------------------|
| Integral gene drive | <i>A. gambiae</i> | Population replacement | CP | <p>The sequence encoding the anti-<i>Plasmodium falciparum</i> peptide Scorpine was linked to the N-terminal of <i>CP</i> via a 2A autocleavage peptide. <i>Scorpine</i> was under control of the native promoter. An artificial intron encoded gRNA and <i>GFP</i> under the <i>3xP3</i> promoter. The <i>GFP</i> marker was later removed. Homology sequences flanked the construct.</p> <p>A separate construct contained <i>Cas9</i> driven by the <i>vasa</i> promoter, cloned into a plasmid containing <i>attB</i>, which was integrated into an <i>attP</i> docking site (E. Marois, unpublished).</p> | <p>Mosquitoes carrying the drive express the anti-microbial peptide Scorpine to target <i>P. falciparum</i>. The mosquito strain carrying the marker showed a reduction in <i>Plasmodium</i> prevalence, but the markerless strain showed an increased <i>Plasmodium</i> infection.</p> | <p>Homing rate 95.95% for marker strain. Markerless strain homing not reported.</p> | Yes | (Hoermann et al. 2021) |
|---------------------|-------------------|------------------------|----|----------------------------------------------------------------------------------------------------------------------------------------------------------------------------------------------------------------------------------------------------------------------------------------------------------------------------------------------------------------------------------------------------------------------------------------------------------------------------------------------------------------------------------------------------------------------------------------------------------------|-----------------------------------------------------------------------------------------------------------------------------------------------------------------------------------------------------------------------------------------------------------------------------------------|-------------------------------------------------------------------------------------|-----|------------------------|



|                     |                   |                        |                                                                                                                                                                                                                                                                                                                                                                                                                                                                                                                                                                                                                 |                                                                                                                                                                                                                                                                                                                    |                                                                                        |     |                        |
|---------------------|-------------------|------------------------|-----------------------------------------------------------------------------------------------------------------------------------------------------------------------------------------------------------------------------------------------------------------------------------------------------------------------------------------------------------------------------------------------------------------------------------------------------------------------------------------------------------------------------------------------------------------------------------------------------------------|--------------------------------------------------------------------------------------------------------------------------------------------------------------------------------------------------------------------------------------------------------------------------------------------------------------------|----------------------------------------------------------------------------------------|-----|------------------------|
| Integral gene drive | <i>A. gambiae</i> | Population replacement | <p><i>APER1</i></p> <p>The sequence encoding the anti-<i>Plasmodium falciparum</i> peptide Scorpine was directly fused to the C-terminal of <i>APER1</i>. <i>Scorpine</i> was under control of the native promoter. An artificial intron encoded gRNA and <i>GFP</i> under the <i>3xP3</i> promoter. The <i>GFP</i> marker was later removed. Homology sequences flanked the construct.</p> <p>A separate construct contained <i>Cas9</i> driven by the <i>vasa</i> promoter, cloned into a plasmid containing <i>attB</i>, which was integrated into an <i>attP</i> docking site (E. Marois, unpublished).</p> | <p>Mosquitoes carrying the drive express the anti-microbial peptide Scorpine to target <i>P. falciparum</i>. However, Mosquitoes carrying the drive containing the marker had no significant effect on <i>Plasmodium</i> prevalence. The markerless strain showed a decrease in <i>Plasmodium</i> infectivity.</p> | <p>Homing rate of 95.95% for marker strain. Markerless strain homing not reported.</p> | Yes | (Hoermann et al. 2021) |
|---------------------|-------------------|------------------------|-----------------------------------------------------------------------------------------------------------------------------------------------------------------------------------------------------------------------------------------------------------------------------------------------------------------------------------------------------------------------------------------------------------------------------------------------------------------------------------------------------------------------------------------------------------------------------------------------------------------|--------------------------------------------------------------------------------------------------------------------------------------------------------------------------------------------------------------------------------------------------------------------------------------------------------------------|----------------------------------------------------------------------------------------|-----|------------------------|

|                          |                   |                        |            |                                                                                                                                                                                                                                                                                                                                                                                                                                                                                                                                                                                                                                                         |                                                                                                                                                                                                                                                                                                  |                                                                                                                                                                                    |     |                                |
|--------------------------|-------------------|------------------------|------------|---------------------------------------------------------------------------------------------------------------------------------------------------------------------------------------------------------------------------------------------------------------------------------------------------------------------------------------------------------------------------------------------------------------------------------------------------------------------------------------------------------------------------------------------------------------------------------------------------------------------------------------------------------|--------------------------------------------------------------------------------------------------------------------------------------------------------------------------------------------------------------------------------------------------------------------------------------------------|------------------------------------------------------------------------------------------------------------------------------------------------------------------------------------|-----|--------------------------------|
| Integral gene drive      | <i>A. gambiae</i> | Population replacement | AP2        | <p>A fusion of GFP and the sequence encoding the anti-<i>Plasmodium falciparum</i> peptide Scorpine was linked to the N-terminal of AP2 via a 2A autocleavage peptide. <i>Scorpine</i> was under control of the native promoter. An artificial intron encoded gRNA and <i>cyan fluorescent protein (CFP)</i> under the <i>3xP3</i> promoter. The <i>CFP</i> marker was later removed. Homology sequences flanked the construct.</p> <p>A separate construct contained <i>Cas9</i> driven by the <i>vasa</i> promoter, cloned into a plasmid containing <i>attB</i>, which was integrated into an <i>attP</i> docking site (E. Marois, unpublished).</p> | Mosquitoes carrying the drive express the anti-microbial peptide Scorpine to target <i>P. falciparum</i> . However, Mosquitoes carrying the drive containing the marker had no effect on <i>Plasmodium</i> prevalence. The markerless strain showed a decrease in <i>Plasmodium</i> infectivity. | Homing rate of 87.87% for marker strain, and 94.98% for markerless strain (difference was not statistically significant).                                                          | Yes | (Hoermann et al. 2021)         |
| 29113 <sup>CRISPRh</sup> | <i>A. gambiae</i> | Population suppression | AGAP029113 | <p><i>Cas9</i> under <i>zpg</i> promoter, gRNA under <i>U6</i> promoter, <i>RFP</i> under <i>3xP3</i> promoter, <i>attP</i> sites to facilitate insertion homology regions.</p>                                                                                                                                                                                                                                                                                                                                                                                                                                                                         | Mosquitoes homozygous for the drive were unlikely to develop to adulthood. However, severe fitness costs to heterozygotes limited drive invasion, and the drive started to decline due to the emergence of resistant alleles.                                                                    | Inheritance rates of 92.7% (maternal inheritance) and 91.3% (male paternal inheritance). Initial increase in cage population, but then a rapid decline—drive lost by generation 3. | Yes | (Fuchs et al. 2021 [preprint]) |
